# Supplementary material for: Construction of a magnetic covalent organic framework with synergistic affinity strategy for enhanced glycopeptide enrichment
Source: Royal Society of Chemistry journal article supplement (doi:10.1039/d1tb01168e), 2021-01-01
Supplement: d1tb01168e1.pdf [file d1tb01168e1.pdf]

## Supplementary Information

### **Construction of magnetic covalent organic framework with synergistic affinity strategy for enhanced glycopeptide enrichment**

Bin Luo,<sup>a</sup> Guohao Li,<sup>a</sup> Zhiyu Li,<sup>a</sup> Jia He,<sup>a</sup> Juan Zhou,<sup>b</sup> Lijuan Wu,<sup>b</sup> Fang Lan,<sup>\*a</sup> and Yao Wu<sup>\*a</sup>

<sup>a</sup>National Engineering Research Center for Biomaterials, Sichuan University, Chengdu 610064, P. R. China

<sup>b</sup>Department of Laboratory Medicine, West China Hospital, Sichuan University, Chengdu, Sichuan 610041, P. R. China

E-mail: fanglan@scu.edu.cn (Fang Lan); wuyao@scu.edu.cn (Yao Wu)

#### **Preparation of standard protein tryptic digestions**

First, the model proteins (IgG, HRP, or BSA) were dissolved in a buffer (8 M urea, 50 mM  $\text{NH}_4\text{HCO}_3$ ). Next, DTT (final concentration of 20 mM) was added into the dissolved model protein (2 mg/mL), and then reacted at 60 °C for 1 hour. Then, IAA (final concentration of 40 mM) was added for 45 minutes at room temperature in the dark. Finally, trypsin was added to the alkylated protein solution for digestion, the mass ratio of trypsin to protein was 1:40 (w/w), and the digestion was carried out at 37 °C for 16 hours.

#### **Preparation of tryptic digests of proteins extracted from rat liver and exosome**

For rat liver, a Sprague-Dawley male rat was sacrificed. Remove the liver immediately, cut into small pieces, and wash with salt water. Grind the liver tissue into powder with a liquid nitrogen mortar. The sample was added to a new 1.5 mL EP test tube, and 400  $\mu\text{L}$  SDT lysis buffer was added to each EP test tube. After that, the samples were mixed and heated at 100 °C for 10 minutes. The sample was then cooled to room temperature in an ice bath, sonicated and loaded onto a 0.22  $\mu\text{m}$  membrane tube, and then centrifuged at 14,000 g for 20 minutes. Next, 100  $\mu\text{L}$  of 50 mM iodoacetamide was added to the filter and then incubated at room temperature for 30 minutes. Then 100  $\mu\text{L}$  of 25 mM ABC (Applied Biosystems, Foster City CA, USA) was added to each filter and centrifuged at 14,000 g for 30 minutes. The protein suspension was then digested with 40  $\mu\text{L}$  trypsin and incubated at 37 °C for 18 hours. Finally, the filtrate was collected by centrifugation at 14000 g for 30 minutes at room temperature. All collected filtrate was lyophilized for further use. For exosome, 5 mL of fresh plasma from healthy

individuals (n=5) and patients diagnosed with renal failure (n=12) were centrifuged at  $10,000\times g$  at  $4\text{ }^{\circ}\text{C}$  for 1 h. The supernatants were collected and centrifuged at ultra-high speed of  $100,000\times g$  at  $4\text{ }^{\circ}\text{C}$  for 2 h. The pellets were washed with PBS and centrifuged at  $100,000\times g$  at  $4\text{ }^{\circ}\text{C}$  for 2 h again. The process of exosome lysis, protein extraction, and digestion were similar to the above.

### **MALDI-TOF MS analysis**

The MALDI-TOF/TOF mass spectrometer (Bruker Daltonics) was employed to analyse all eluent samples from standard protein tryptic digests in reflector positive mode. Matrix DHB was dissolved in 70% ACN- $\text{H}_2\text{O}$  containing 1%  $\text{H}_3\text{PO}_4$  ( $25\text{ mg mL}^{-1}$ ). A  $0.5\text{ }\mu\text{L}$  aliquot of the eluent and  $0.5\text{ }\mu\text{L}$  of DHB matrix were sequentially dropped onto the MALDI plate for MS analysis.

### **Elite-LC-MS/MS analysis**

The samples were analyzed using Easy-nLC nanoflow HPLC system connected to Orbitrap Elite mass spectrometer (Thermo Fisher Scientific, San Jose, CA, USA). One microgram of each sample was loaded onto Thermo Scientific EASY column (two columns) at a flow rate of  $200\text{ nL/min}$ . The sequential separation of peptides on Thermo Scientific EASY trap column ( $100\text{ }\mu\text{m}\times 2\text{ cm}$ ,  $5\text{ }\mu\text{m}$ ,  $100\text{ \AA}$ , C18) and analytical column ( $75\text{ }\mu\text{m}\times 25\text{ cm}$ ,  $5\text{ }\mu\text{m}$ ,  $100\text{ \AA}$ , C18) was accomplished using a segmented 1 h gradient from 5% to 28% Solvent B (0.1% formic acid in 100% ACN) for 40 min, followed by 28-90% Solvent B for 2 min and then 90% Solvent B for 18 min. The mass spectrometer was operated in positive ion mode. The dynamic exclusion duration was 30s. The raw files were analyzed using the Proteome Discoverer 2.1 software (Thermo Fisher Scientific). The acquired data was searched against the uniprot rat protein sequence database (version 1.4.1.1). As for the exosome sample, the raw files were searched by Mascot (version 2.4.1) against a human protein database (20397 entries) from Uniprot. The following search parameters were used: monoisotopic mass, trypsin as the cleavage enzyme, two missed cleavages, carbamidomethylation of cysteine as fixed modifications, peptide charges of 2+, 3+, and 4+, and the oxidation of methionine and Delta:  $\text{H}(1)\text{O}(-1)\text{18O}(1)$  of Asn (glycosylated asparagine 18O labeling) were specified as variable modifications. The mass tolerance was set to 20 ppm for precursor ions and to 0.1 Da for the fragment ions. The results were filtered based on a false discovery rate (FDR) of no more than 1% both for protein and peptide.

### **Characterization**

Scanning electron microscopy (SEM, Hitachi S-4800, Japan) and transmission electron microscopy (TEM, JEM- 2010, Japan electronic) were used to analysis the morphologies of the samples. The size distribution were calculated via dynamic light scattering (DLS, Zetasizer Nano ZS90, Malvern Company). Crystal structure was tested by powder X-ray diffraction (XRD, X' Pert Pro MPD, Philips, Netherlands).

Surface area and pore size analyzer (QuadraSorb SI, America) was employed to study the surface and BJH pore size distribution at 77K. Fourier transform infrared spectra was obtained by spectrometer (FT-IR, PE spectrometer) with wave number range 500-4000  $\text{cm}^{-1}$ . The mass loss of sample was analyzed at temperature ranging from 35 to 800  $^{\circ}\text{C}$  with the heating rate of 10K/min by simultaneous thermal analysis (STA449 C Jupiter, NETZSCH). Vibrating sample magnetometer (VSM, model BHV-525, Riken Japanese Electronics Company) was employed to measure the magnetization of the sample with field from 0 Oe to 18000 Oe at 300K. X-ray photoemission spectroscopy (XPS) was obtained using a Kratos XSAM 800 instrument equipped with a monochromatic Al anode X-ray gun (12 kV, 15 mA,  $10^{-5}$  Pa).

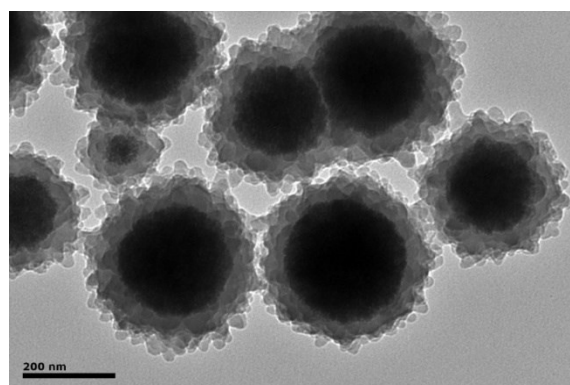

**Fig. S1** TEM micrograph of the SPIOs@Polymer@COF nanocomposites.

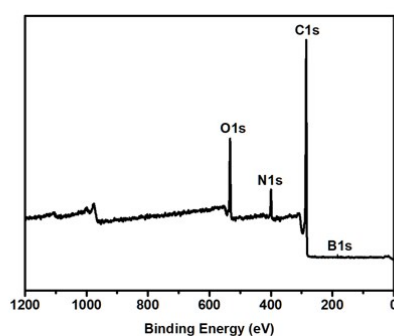

| Sample                 | C (at.%) | N (at.%) | O (at.%) | B (at.%) |
|------------------------|----------|----------|----------|----------|
| SPIO@PVP/PEI@COF(20%B) | 82.05    | 4.72     | 12.83    | 0.4      |
| SPIO@PVP/PEI@COF(40%B) | 77.57    | 6.58     | 15.27    | 0.58     |
| SPIO@PVP/PEI@COF(60%B) | 79.66    | 7.08     | 12.44    | 0.82     |
| SPIO@PVP/PEI@COF(80%B) | 76.76    | 6.88     | 15.41    | 0.95     |

**Fig. S2** High-resolution XPS spectra of the SPIOs@Polymer@COF(80%B) nanocomposites. Determination of elemental ratio in SPIOs@Polymer@COF(B) nanocomposites containing different boric acid by XPS.

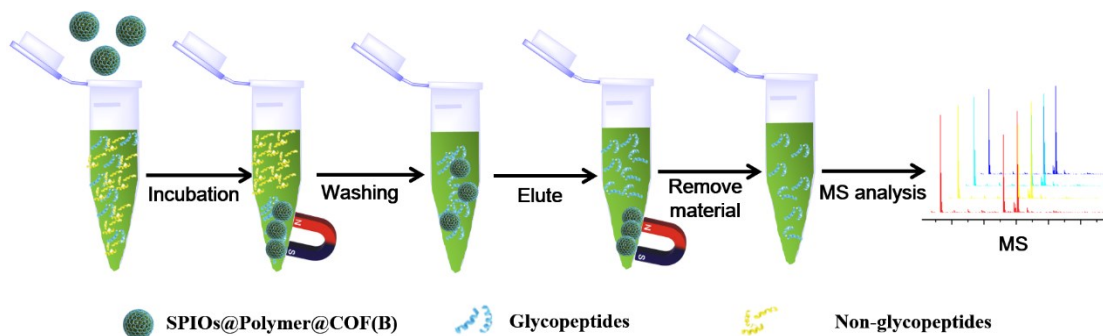

**Fig. S3** Workflow of glycopeptide enrichment by the SPIOs@Polymer@COF(B) nanocomposites.

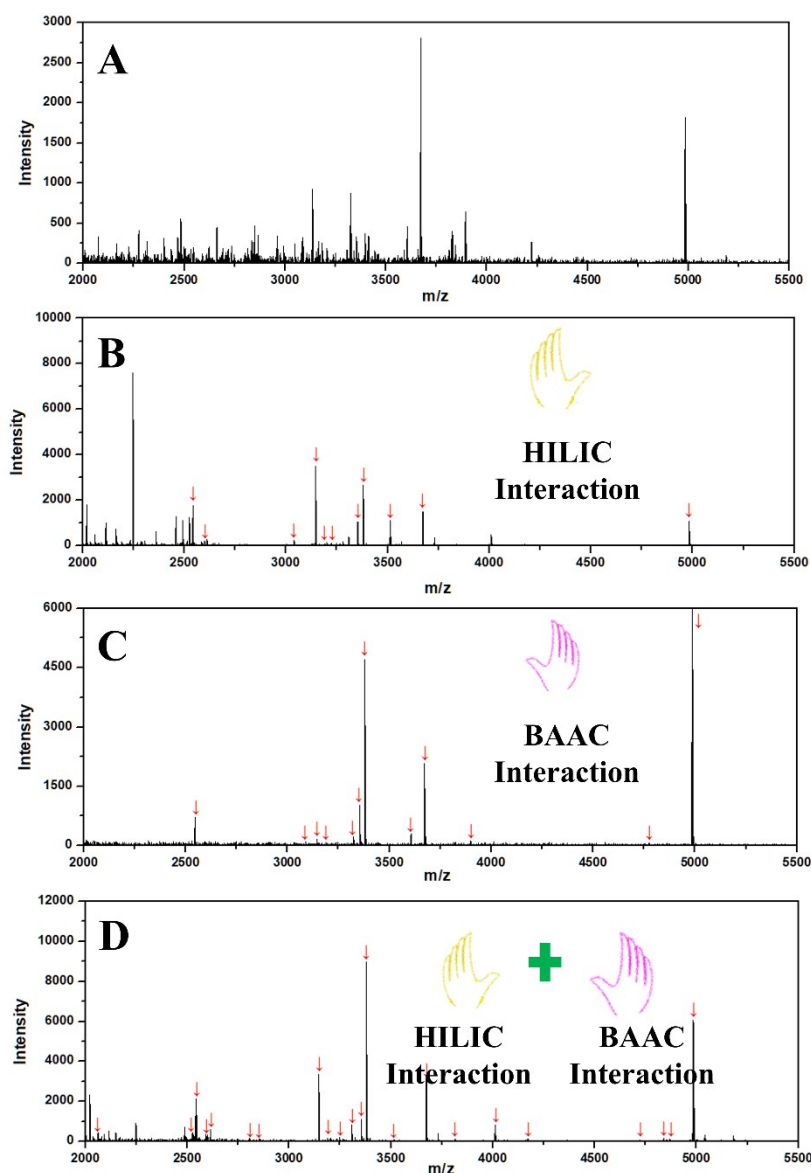

**Fig. S4** MALDI-TOF mass spectra of HRP digests (A) before enrichment and after enrichment by SPIOs@Polymer@COF(B) nanocomposites (B) under the HILIC mode, (C) under BAAC mode,

and (D) under HILIC and BAAC modes. Glycopeptides are marked with red arrows.

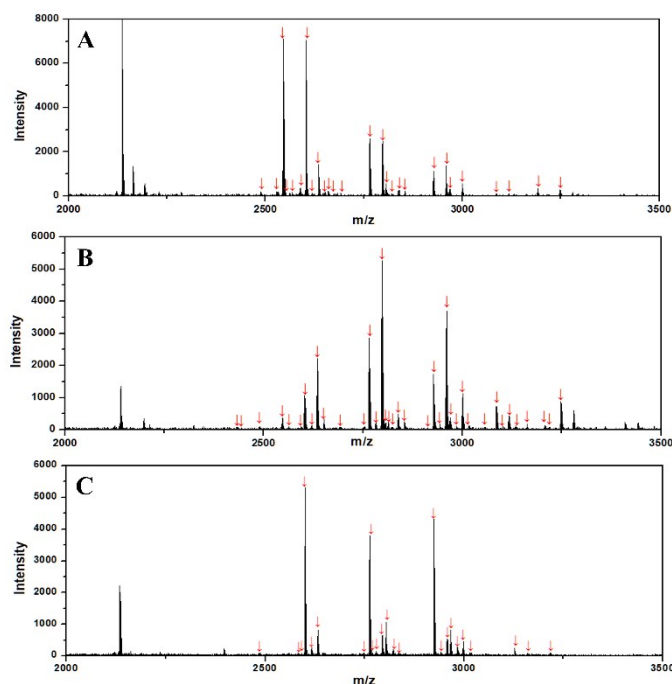

**Fig. S5** MALDI-TOF mass spectra of IgG digests after enrichment by (A) SPIOs@Polymer@COF(40%B) nanocomposites, (B) SPIOs@Polymer@COF(60%B) nanocomposites, and (C) SPIOs@Polymer@COF(80%B) nanocomposites. Glycopeptides are marked with red arrows.

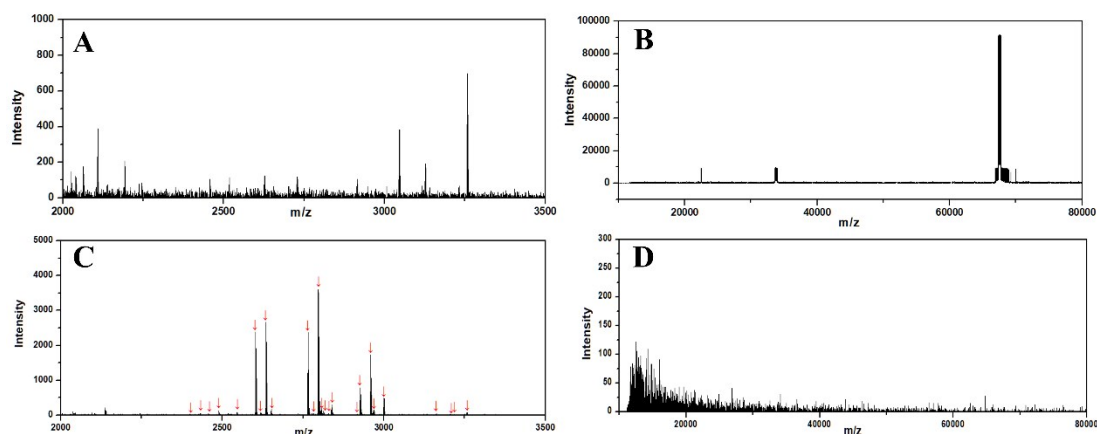

**Fig. S6** MALDI-TOF mass spectra analysis of glycopeptides enriched from the mixture of IgG digests and nonglycoprotein BSA at the molar ratio of 1:500. Supernatant before enrichment (A) in reflection positive mode and (B) in high linear mode, eluate after treatment with SPIOs@Polymer@COF(B) (C) in reflection positive mode and (D) in high linear mode. Glycopeptides are marked with red arrows.

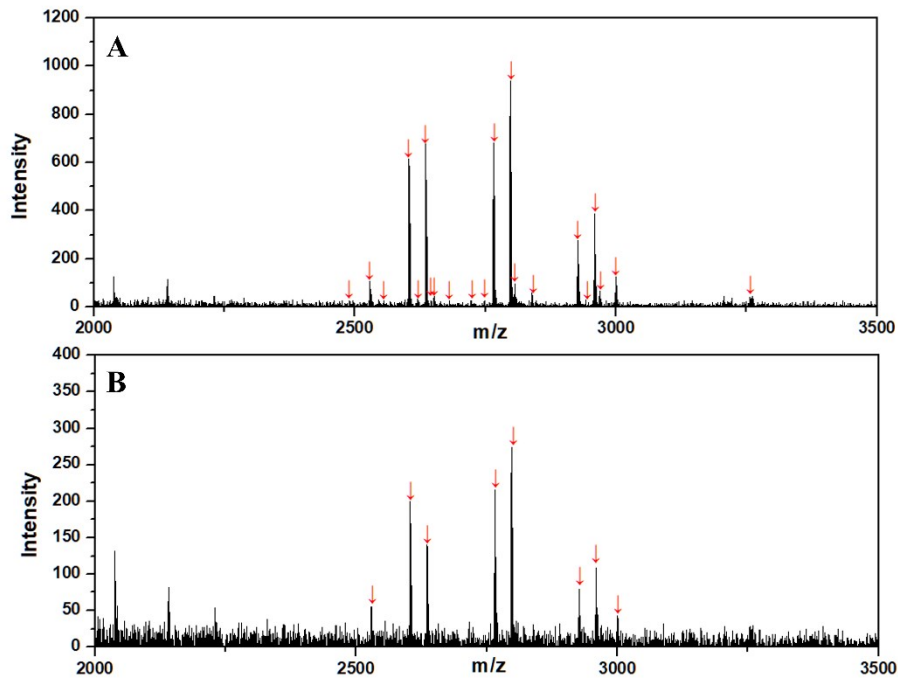

**Fig. S7** MALDI-TOF-MS analysis of the tryptic digest mixture of IgG with different concentrations after enrichment with the SPIOs@Polymer@COF(B) nanocomposites: (A) 0.5 fmol/μL and (B) 0.05 fmol/μL. Glycopeptides are marked with red arrows.

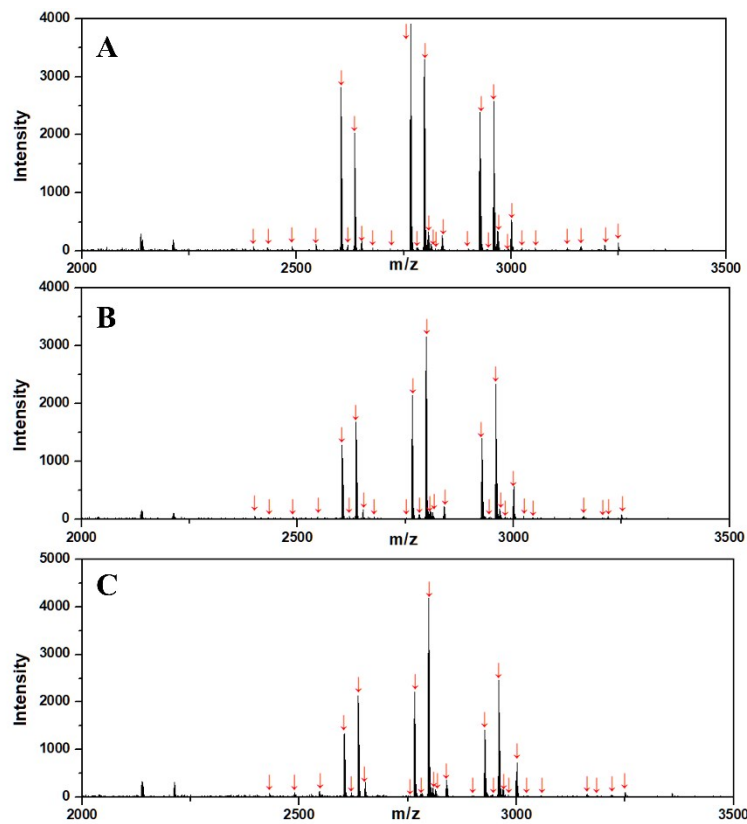

**Fig. S8** MALDI-TOF-MS analysis for the glycopeptides derived from IgG tryptic digest after treatment with the SPIOs@Polymer@COF(B) nanocomposites used for the (A) first time, (B) third time, and (C) fifth time. Glycopeptides are marked with red arrows.

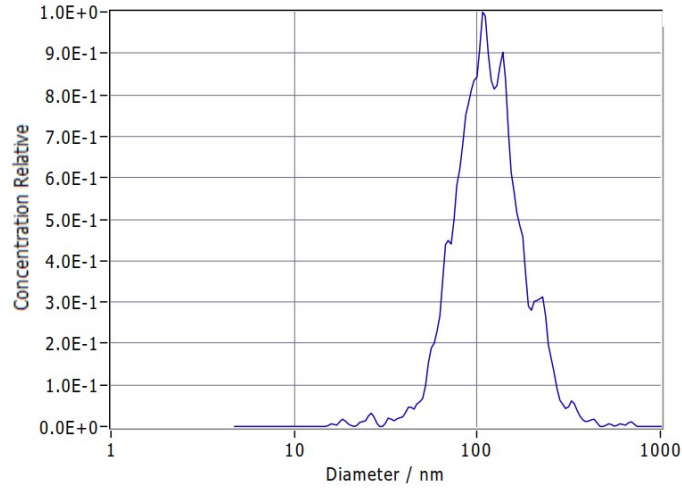

**Fig. S9** The nanoparticle tracking analysis of the exosomes.

**Table S1** Observed molecular masses, proposed glycan compositions and peptide sequences of N-linked glycopeptides enriched from human IgG tryptic digests by the SPIOs@Polymer@COF(B) nanocomposites. Hex, HexNAc, Fuc and NeuAc are the abbreviations of hexose, N-acetylhexosamine, fucose and N-acetylneuraminic acid, respectively. N# denotes the glycosylation sites.

| Peak number | m/z    | Glycan composition    | Peptide sequence |
|-------------|--------|-----------------------|------------------|
| 11          | 2236.9 | [Hex]2 [NAc]3 [Fuc]1  | EEQFN#STFR       |
| 12          | 2269.2 | [Hex]2[HexNAc]3[Fuc]1 | EEQYN#STYR       |
| 13          | 2399.6 | [Hex]3[HexNAc]3[Fuc]1 | EEQFN#STFR       |
| 14          | 2432.3 | [Hex]3[HexNAc]3[Fuc]1 | EEQYN#STYR       |
| 15          | 2456.9 | [Hex]3[HexNAc]4       | EEQFN#STFR       |
| 16          | 2489.2 | [Hex]3[HexNAc]4       | EEQYN#STYR       |
| 17          | 2562.2 | [Hex]4[HexNAc]3[Fuc]1 | EEQFN#STFR       |
| 18          | 2593.8 | [Hex]4[HexNAc]3[Fuc]1 | EEQYN#STYR       |
| 19          | 2603.3 | [Hex]3[HexNAc]4[Fuc]1 | EEQFN#STFR       |
| I10         | 2619.4 | [Hex]4[HexNAc]4       | EEQFN#STFR       |
| I11         | 2635.1 | [Hex]3[HexNAc]4[Fuc]1 | EEQYN#STYR       |
| I12         | 2650.9 | [Hex]4[HexNAc]4       | EEQYN#STYR       |
| I13         | 2660.2 | [Hex]3[HexNAc]5       | EEQFN#STFR       |

|     |        |                               |                |
|-----|--------|-------------------------------|----------------|
| I14 | 2692.6 | [Hex]3[HexNAc]5               | EEQYN#STYR     |
| I15 | 2765.2 | [Hex]4[HexNAc]4[Fuc]1         | EEQFN#STFR     |
| I16 | 2781.6 | [Hex]5[HexNAc]4               | EEQFN#STFR     |
| I17 | 2797.2 | [Hex]4[HexNAc]4[Fuc]1         | EEQYN#STYR     |
| I18 | 2806.4 | [Hex]3[HexNAc]5[Fuc]1         | EEQFN#STYR     |
| I19 | 2813.2 | [Hex]5[HexNAc]4               | EEQYN#STFR     |
| I20 | 2822.5 | [Hex]4[HexNAc]5               | EEQFN#STFR     |
| I21 | 2838.2 | [Hex]3[HexNAc]5[Fuc]1         | EEQYN#STYR     |
| I22 | 2854.3 | [Hex]4[HexNAc]5               | EEQYN#STYR     |
| I23 | 2910.7 | [Hex]4[HexNAc]4 [NeuAc]1      | EEQFN#STFR     |
| I24 | 2927.6 | [Hex]5[HexNAc]4[Fuc]1         | EEQFN#STFR     |
| I25 | 2942.4 | [Hex]4[HexNAc]4 [NeuAc]1      | EEQYN#STYR     |
| I26 | 2959.3 | [Hex]5[HexNAc]4[Fuc]1         | EEQYN#STYR     |
| I27 | 2968.2 | [Hex]4[Hex7NAc]5[Fuc]1        | EEQFN#STFR     |
| I28 | 2984.1 | [Hex]5[HexNAc]5               | EEQFN#STFR     |
| I29 | 3000.6 | [Hex]4[HexNAc]5[Fuc]1         | EEQYN#STYR     |
| I30 | 3016.5 | [Hex]5[HexNAc]5               | EEQYN#STYR     |
| I31 | 3056.7 | [Hex]4[HexNAc]4[Fuc]1[NeuAc]1 | EEQFN#STFR     |
| I32 | 3104.2 | [Hex]5[HexNAc]4[NeuAc]1       | EEQYN#STYR     |
| I33 | 3129.8 | [Hex]5[HexNAc]5[Fuc]1         | EEQFN#STFR     |
| I34 | 3162.3 | [Hex]5[HexNAc]5[Fuc]1         | EEQYN#STYR     |
| I35 | 3205.1 | [Hex]5[HexNAc]3[Fuc]1         | TKPREEQFN#STFR |
| I36 | 3219.6 | [Hex]5[HexNAc]4[Fuc]1[NeuAc]1 | EEQFN#STFR     |
| I37 | 3250.5 | [Hex]5[HexNAc]4[Fuc]1[NeuAc]1 | EEQYN#STYR     |



**Table S2** Observed molecular masses, proposed glycan compositions and peptide sequences of N-linked glycopeptides enriched from HRP tryptic digests by the SPIOs@Polymer@COF(B) nanocomposites. Hex, HexNAc, Fuc and Xyl are the abbreviations of hexose, N-acetylhexosamine, fucose and xylose, respectively. N# denotes the glycosylation sites.

| Peak number | m/z    | Glycan composition                                   | Peptide sequence                |
|-------------|--------|------------------------------------------------------|---------------------------------|
| H1          | 2068.6 | [Hex]3[HexNAc]2[Fuc]1[Xyl]1                          | PNVSN#IVR                       |
| H2          | 2533.2 | [HexNAc]1[Fuc]1                                      | SFAN#STQTFNFAFVEAMDR            |
| H3          | 2542.3 | [Hex]3[HexNAc]2[Fuc]1[Xyl]1                          | SSPN#ATDTIPLVR                  |
| H4          | 2592.1 | [Hex]3[HexNAc]2[Fuc]1[Xyl]1                          | PTLN#TTYLQTLR                   |
| H5          | 2612.1 | [Hex]3[HexNAc]2[Xyl]1                                | MGN#ITPLTGTGQQIR                |
| H6          | 2803.6 | [Hex]2[HexNAc]2                                      | MGN#ITPLTGTGQQIRLNCR            |
| H7          | 2851.4 | [HexNAc][Fuc]1                                       | GLIQSDQELFSSPN#ATDTIPLVR        |
| H8          | 3146.4 | [Hex]3[HexNAc]2[Fuc]1[Xyl]1                          | GLCPLNGN#LSALVDFDLR.Oxide       |
| H9          | 3190.4 | [HexNAc]1[Fuc]1                                      | LHFHDCFVNGCDASILLDN#TTSFR.Oxide |
| H10         | 3222.2 | [Hex]3[HexNAc]2[Fuc]1                                | SFAN#STQTFNFAFVEAMDR            |
| H11         | 3322.6 | [Hex]3[HexNAc]2[Fuc]1[Xyl]1                          | QLTPTFYDNPCPN#VSNIVR            |
| H12         | 3354.2 | [Hex]3[HexNAc]2[Fuc]1[Xyl]1                          | SFAN#STQTFNFAFVEAMDR            |
| H13         | 3379.2 | [Hex]2[HexNAc]2[Fuc]1                                | GLIQSDQELFSSPN#ATDTIPLVR        |
| H14         | 3510.1 | [Hex]2[HexNAc]2[Fuc]1[Xyl]1                          | GLIQSDQELFSSPN#ATDTIPLVR        |
| H15         | 3672.2 | [Hex]3[HexNAc]2[Fuc]1[Xyl]1                          | GLIQSDQELFSSPN#ATDTIPLVR        |
| H16         | 3812.7 | [Hex]2[HexNAc]2                                      | LHFHDCFVNGCDASILLDN#TTSFRTEK    |
| H17         | 4057.6 | [Hex]4[HexNAc]2[Fuc]1[Xyl]1                          | LHFHDCFVNGCDASILLDN#TTSFR       |
| H18         | 4222.2 | [Hex]3[HexNAc]2[Fuc]1[Xyl]1                          | QLTPTFYDNPC(AAVESACPR)PN#VSNIVR |
| H19         | 4720.2 | [Hex]3[HexNAc]2[Fuc]1<br>[Hex]3[HexNAc]2[Fuc]1       | LYN#FSNTGLPDPTLN#TTYLQTLR       |
| H20         | 4839.6 | [Hex]3[HexNAc]2[Fuc]1[Xyl]1<br>[Hex]3[HexNAc]2[Xyl]1 | LYN#FSNTGLPDPTLN#TTYLQTLR       |
| H21         | 4852.7 | [Hex]3[HexNAc]2[Fuc]1[Xyl]1<br>[Hex]3[HexNAc]2[Fuc]1 | LYN#FSNTGLPDPTLN#TTYLQTLR       |

|     |        |                                                            |                           |
|-----|--------|------------------------------------------------------------|---------------------------|
| H22 | 4984.6 | [Hex]3[HexNAc]2[Fuc]1[Xyl]1<br>[Hex]3[HexNAc]2[Fuc]1[Xyl]1 | LYN#FSNTGLPDPTLN#TTYLQTLR |
|-----|--------|------------------------------------------------------------|---------------------------|

**Table S3** The comparison of the SPIOs@Polymer@COF(B) nanocomposites with the other reported affinity materials.

| No. | Materials                                                        | sample source | Performance | Journal                                        |
|-----|------------------------------------------------------------------|---------------|-------------|------------------------------------------------|
| 1   | magOTfP5SOFGa <sup>3+</sup>                                      | Rat liver     | 1006        | Anal. Chem. , 2020, 92, 2680-2689              |
| 2   | GO-PEI-Carr                                                      | Rat liver     | 149         | Anal. Chem. , 2019, 91, 4047-4054              |
| 3   | GO-Fe <sub>3</sub> O <sub>4</sub> /SiO <sub>2</sub> /AuNWs/L-Cys | Rat liver     | 793         | Analytica Chimica Acta, 2017, 970, 47-56       |
| 4   | MAR@MOP                                                          | Rat liver     | 811         | Analytica Chimica Acta, 2018, 1030, 96-104     |
| 5   | SPIOs@SiO <sub>2</sub> @MOF                                      | Rat liver     | 152         | ACS Sustainable Chem. Eng., 2019, 7, 6043-6052 |
| 6   | MAR@(HA/CS)                                                      | Rat liver     | 1353        | Journal of Chromatography A, 2017, 1498, 72-79 |
| 7   | Fe <sub>3</sub> O <sub>4</sub> @Polymer@COF(B)                   | Rat liver     | 1921        | This work                                      |
